# Supplementary material for: Enhanced conductivity and photoresponse at a rubrene single-crystal–PCBM film interface
Source: Royal Society of Chemistry journal article supplement (doi:10.1039/c4tc00051j), 2014-01-01
Supplement: c4tc00051j1.pdf [file c4tc00051j1.pdf]

## Enhanced Conductivity and Photoresponse in Rubrene Single-Crystal/PCBM Film Heterojunctions

Rui M. Pinto, Ermelinda M. S. Maçôas, and Helena Alves

*INESC MN and IN, Rua Alves Redol, 9, 1000-029 Lisboa, Portugal, and CQFM-Centro de Química-Física Molecular and IN, Instituto Superior Técnico, Av. Rovisco Pais, 1049-001 Lisboa, Portugal*

*E-mail: halves@inesc-mn.pt*

*Phone: +351-21-3100237 . Fax: +351-21-3145843*

---

### SUPPORTING INFORMATION

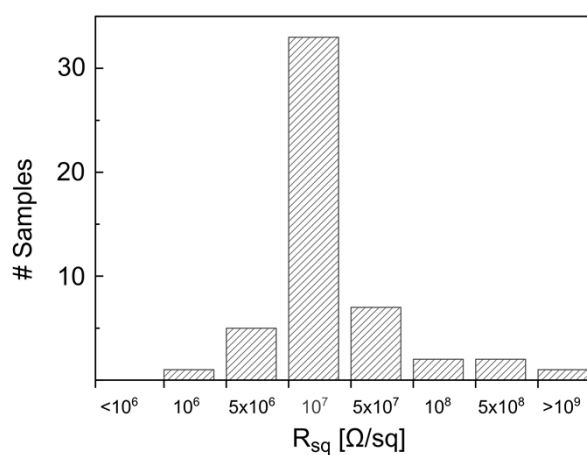

**Figure S1.** Histogram of the sheet resistance values of PCBM/rubrene interfaces, in a two-probe configuration for 50 samples.

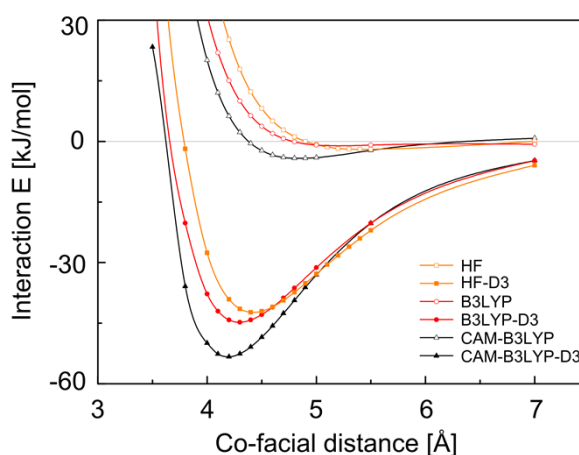

**Figure S2.** Evolution of the interaction energy of PCBM/rubrene with co-facial approximation, computed with HF and DFT B3LYP, including dispersion energy (-D3) and long-range corrections (CAM-).

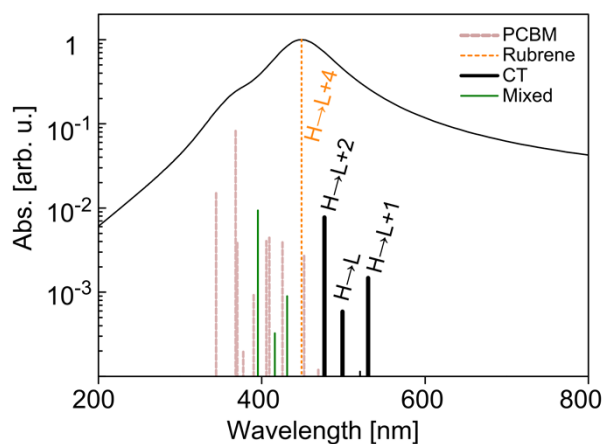

**Figure S3.** Absorption stick spectrum of the interface ( $z=4.2$  Å), showing the degree of delocalization of singlet excitations, from TD-DFT results obtained at the CAM-B3LYP/6-31G level of theory.

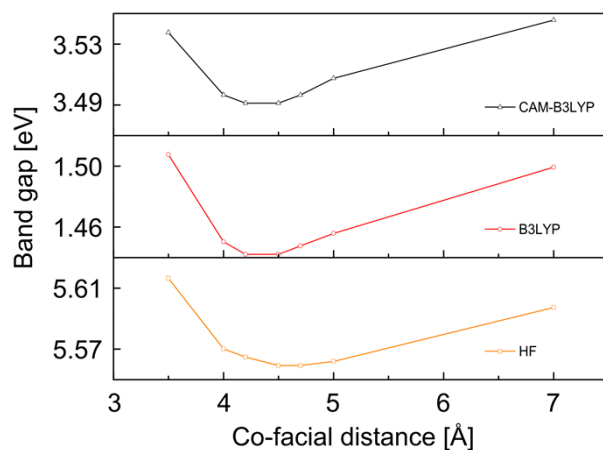

**Figure S4.** Evolution of the band gap with PCBM/rubrene distance, in co-facial approximation, computed at different levels of theory.

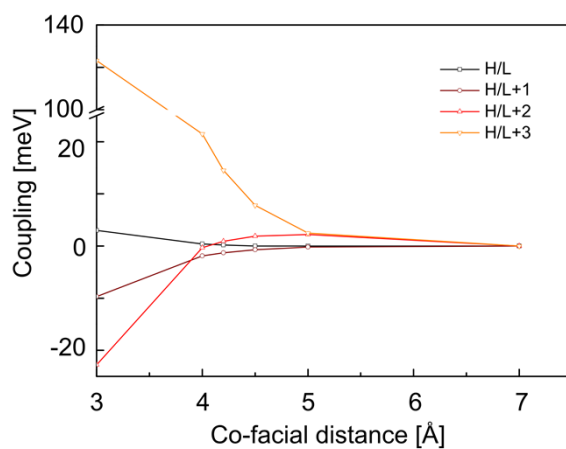

**Figure S5.** Effective electronic coupling between HOMO (rubrene) and LUMO to LUMO+3 (PCBM), as a function of co-facial approximation, evaluated using the projective method on CAM-B3LYP results.

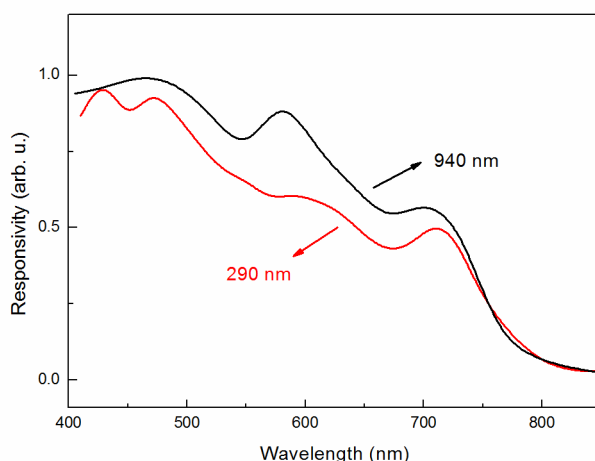

**Figure S6.** Normalized responsivity of PCBM/rubrene interfaces, using rubrene crystals of different thicknesses (290 and 940 nm) on top of PCBM films (~500 nm).

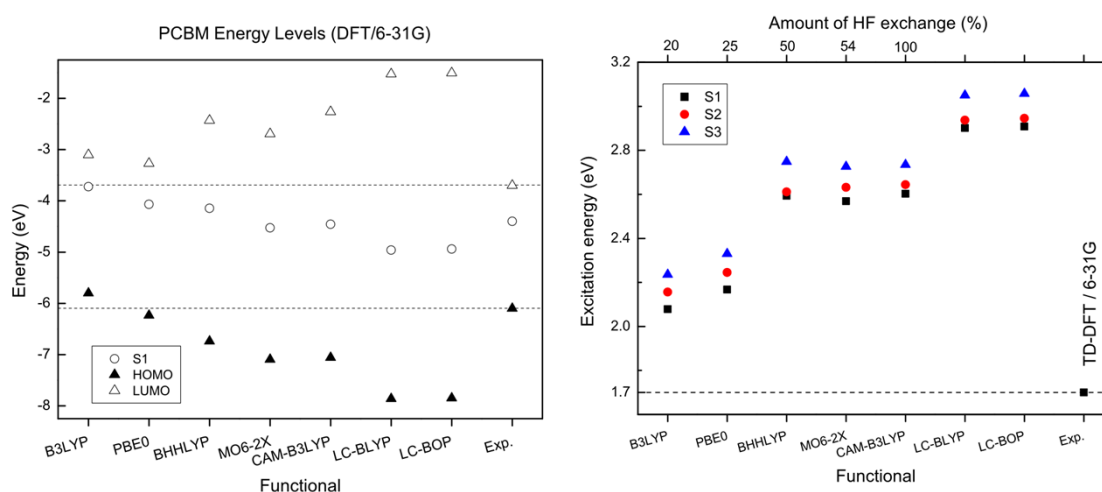

**Figure S7.** DFT functional pre-screening based for PCBM, using HOMO, LUMO and singlet excitation energies as figures of merit.

**Table S1.** Computed and experimental ionization energies (IE), electron affinities (EA) and electronic bandgaps, for rubrene and PCBM, in eV. Theoretical IE and EA are estimated via Koopmans' theorem.

|              | Rubrene SC [1, 2] |      |                    | PCBM film [3] |      |                    |
|--------------|-------------------|------|--------------------|---------------|------|--------------------|
|              | IE                | EA   | Electronic bandgap | IE            | EA   | Electronic bandgap |
| <b>Exp.</b>  | 4.85              | 2.05 | 2.80               | 6.1           | 3.7  | 2.4                |
| HF           | 6.13              | 1.02 | 5.11               | 7.55          | 0.50 | 7.05               |
| <b>B3LYP</b> | 4.63              | 1.92 | 2.71               | 5.80          | 3.10 | 2.70               |
| CAM-B3LYP    | 5.83              | 0.99 | 4.84               | 7.06          | 2.26 | 4.80               |

[1] N. Sai et al, Phys. Rev. B, 2008, 77, 161306.

[2] Y. Nakayama et al, Appl. Phys. Lett., 2008, 93, 173305.

[3] E. J. Meijer et al, Nat. Mater., 2003, 2, 678.
